# Supplementary material for: Physiological mechanisms of adaptive developmental plasticity in Rana temporaria island populations
Source: PubMed Central journal article supplement (PMC5501514; doi:10.1186/s12862-017-1004-1), 2017-07-07

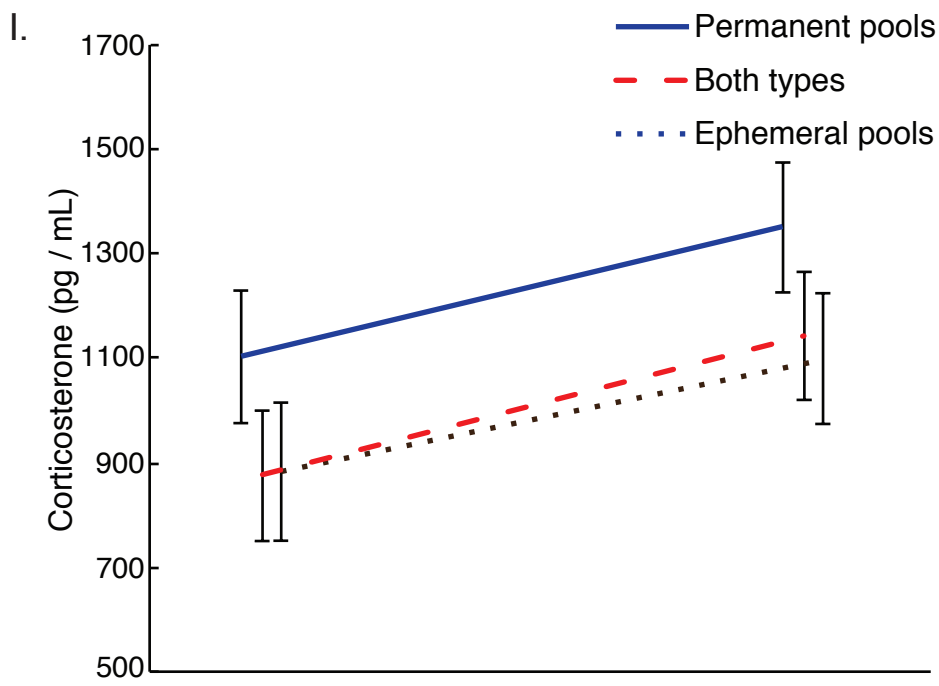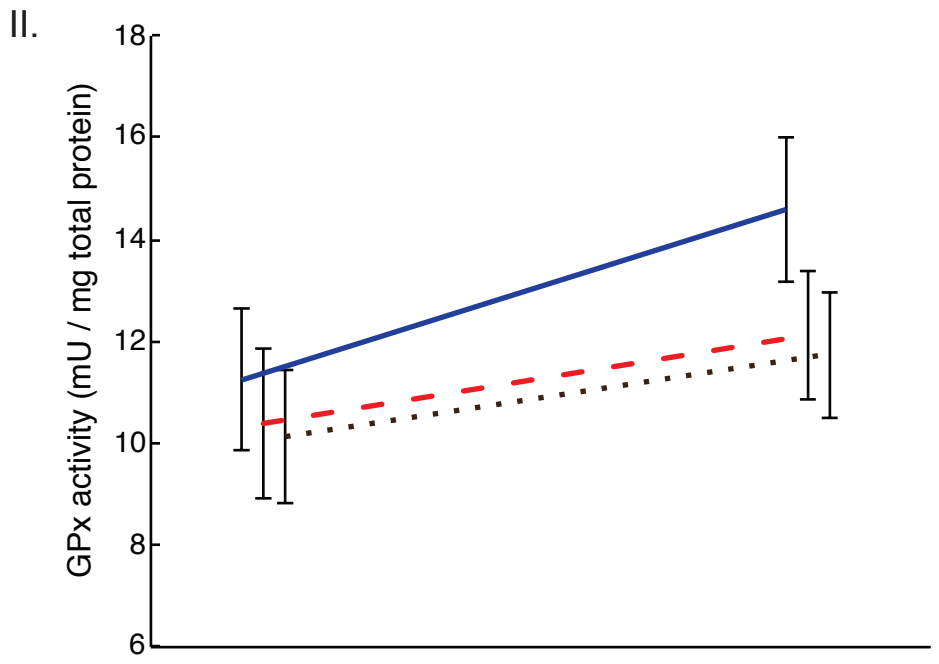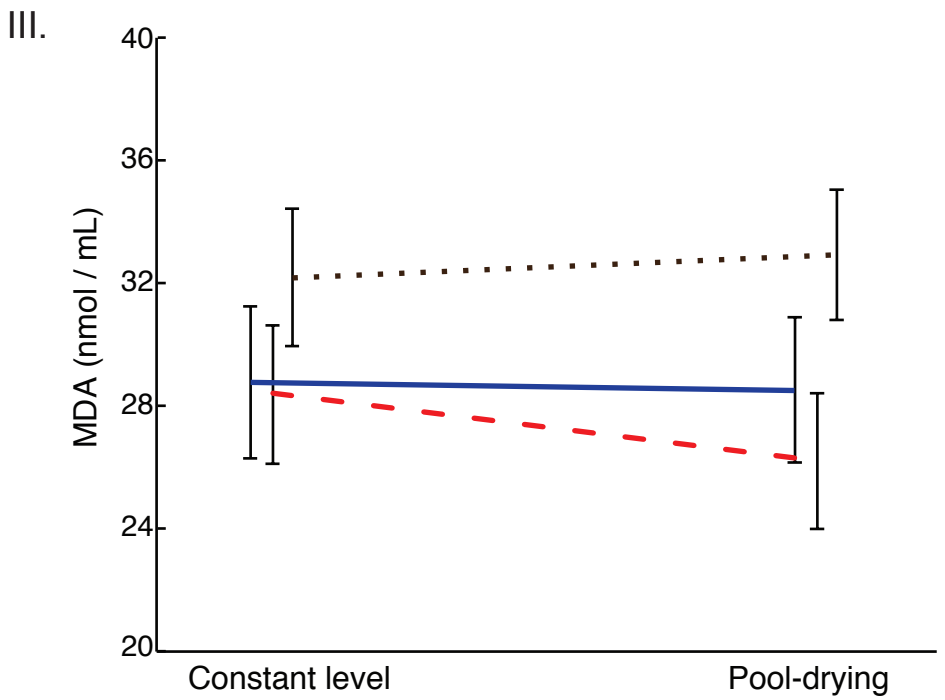

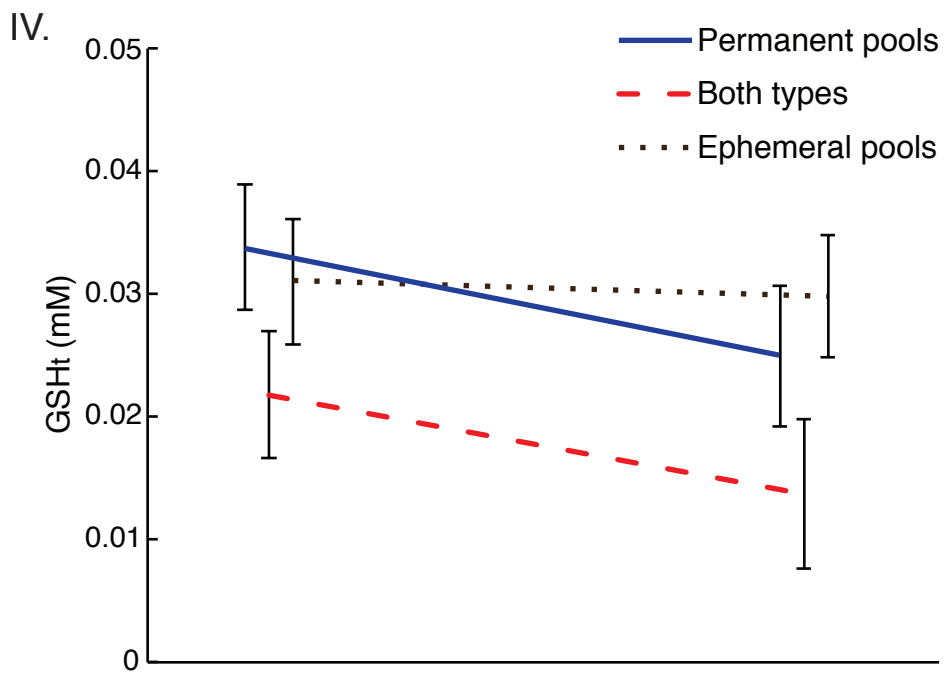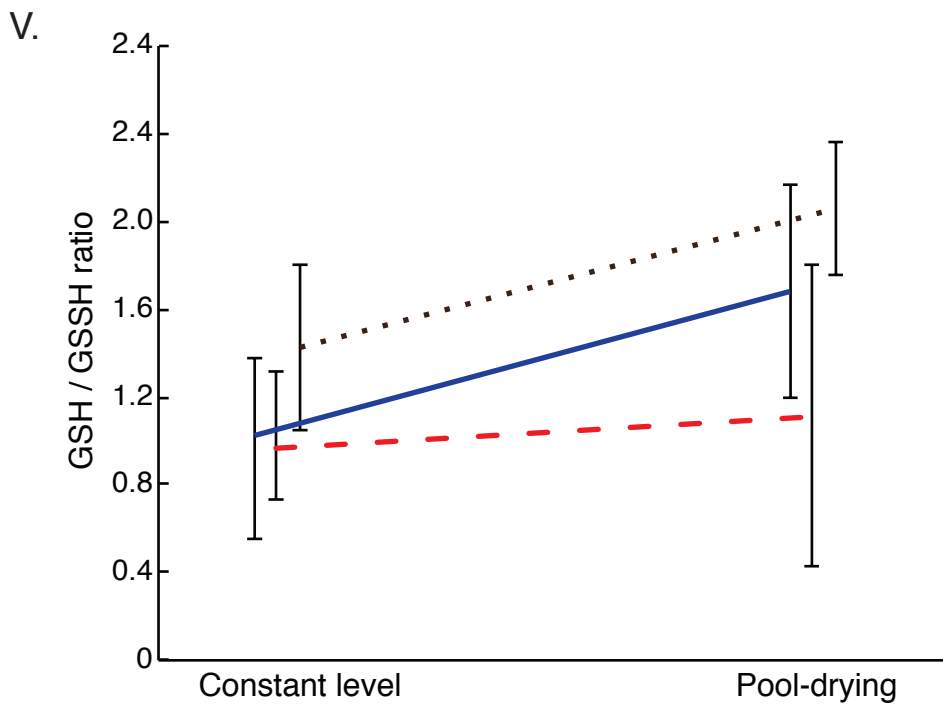

Supplement: 12862_2017_1004_MOESM2_ESM.pdf [file 12862_2017_1004_MOESM2_ESM.pdf]
